# Supplementary material for: Generalised framework for multi-criteria method selection: Rule set database and exemplary decision support system implementation blueprints
Source: PubMed Central journal article supplement (PMC6327857; doi:10.1016/j.dib.2018.12.015), 2018-12-12
Supplement: mmc1.pdf [file mmc1.pdf]

## Conflict of Interest and Authorship Conformation Form

Please check the following as appropriate:

- All authors have participated in (a) conception and design, or analysis and interpretation of the data; (b) drafting the article or revising it critically for important intellectual content; and (c) approval of the final version.
- This manuscript has not been submitted to, nor is under review at, another journal or other publishing venue.
- The authors have no affiliation with any organization with a direct or indirect financial interest in the subject matter discussed in the manuscript
- The following authors have affiliations with organizations with direct or indirect financial interest in the subject matter discussed in the manuscript:

|                      |                                                                                                                                                                                                                                                                                                                                                                                                                  |
|----------------------|------------------------------------------------------------------------------------------------------------------------------------------------------------------------------------------------------------------------------------------------------------------------------------------------------------------------------------------------------------------------------------------------------------------|
| <b>Authors:</b>      | Jarosław Wątróbski <sup>1</sup> Jarosław Jankowski <sup>2</sup> Paweł Ziemba <sup>1</sup><br>Artur Karczmarczyk <sup>2</sup> Magdalena Ziolo <sup>1</sup>                                                                                                                                                                                                                                                        |
| <b>Affiliations:</b> | <sup>1</sup> Faculty of Economics and Management, University of Szczecin, Mickiewicza 64,<br>71-101, Szczecin, Poland,<br>{jaroslaw.watrobowski@wneiz.pl, pziemba@ajp.edu.pl,<br>magdalena.ziolo@usz.edu.pl}<br><sup>2</sup> Faculty of Computer Science and Information Systems, West Pomeranian University of Technology, Zolnierska 49, 71-210 Szczecin, Poland, {jjankowski,<br>akarczmarczyk}@wi.zut.edu.pl |
